# Supplementary material for: Cross-cultural adaptation and measurement properties of the French version of the Trinity Amputation and Prosthesis Experience Scales—Revised (TAPES-R)
Source: PubMed Central journal article supplement (PMC7034834; doi:10.1371/journal.pone.0229084), 2020-02-21
Supplement: pone.0229084.s001.pdf [file pone.0229084.s001.pdf]

## TAPES-R-F

Ce questionnaire a pour but de mesurer la façon dont vous vous êtes adapté(e) à votre amputation, l'influence de l'amputation sur vos activités quotidiennes ainsi que votre degré de satisfaction avec votre prothèse. Ce n'est pas un test, il n'y a pas de réponse juste ou fautive. Merci de répondre aussi précisément que vous le pouvez à chacune des questions, en cochant la case qui correspond le mieux à ce que vous pensez :

| <b>Adaptation psycho-sociale</b>                                                | Pas du tout d'accord     | Pas d'accord             | D'accord                 | Totalement d'accord      |
|---------------------------------------------------------------------------------|--------------------------|--------------------------|--------------------------|--------------------------|
| 1. Je me suis adapté(e) à avoir une prothèse                                    | <input type="checkbox"/> | <input type="checkbox"/> | <input type="checkbox"/> | <input type="checkbox"/> |
| 2. Avec le temps qui passe, j'accepte mieux ma prothèse                         | <input type="checkbox"/> | <input type="checkbox"/> | <input type="checkbox"/> | <input type="checkbox"/> |
| 3. J'ai le sentiment d'avoir réussi à gérer ce traumatisme dans ma vie          | <input type="checkbox"/> | <input type="checkbox"/> | <input type="checkbox"/> | <input type="checkbox"/> |
| 4. Même si j'ai une prothèse, ma vie est bien remplie                           | <input type="checkbox"/> | <input type="checkbox"/> | <input type="checkbox"/> | <input type="checkbox"/> |
| 5. Je me suis habitué(e) à porter une prothèse                                  | <input type="checkbox"/> | <input type="checkbox"/> | <input type="checkbox"/> | <input type="checkbox"/> |
| 6. Ça m'est égal si quelqu'un regarde ma prothèse                               | <input type="checkbox"/> | <input type="checkbox"/> | <input type="checkbox"/> | <input type="checkbox"/> |
| 7. Je parle facilement de ma prothèse                                           | <input type="checkbox"/> | <input type="checkbox"/> | <input type="checkbox"/> | <input type="checkbox"/> |
| 8. Ça ne me dérange pas si quelqu'un me pose des questions sur ma prothèse      | <input type="checkbox"/> | <input type="checkbox"/> | <input type="checkbox"/> | <input type="checkbox"/> |
| 9. Je parle facilement avec les autres de mon membre perdu                      | <input type="checkbox"/> | <input type="checkbox"/> | <input type="checkbox"/> | <input type="checkbox"/> |
| 10. Ça m'est égal si quelqu'un remarque que je boite                            | <input type="checkbox"/> | <input type="checkbox"/> | <input type="checkbox"/> | <input type="checkbox"/> |
| 11. Une prothèse limite mes capacités à faire mon travail                       | <input type="checkbox"/> | <input type="checkbox"/> | <input type="checkbox"/> | <input type="checkbox"/> |
| 12. Avoir une prothèse me rend plus dépendant des autres que ce que je voudrais | <input type="checkbox"/> | <input type="checkbox"/> | <input type="checkbox"/> | <input type="checkbox"/> |
| 13. Avoir une prothèse limite le genre de travail que je peux faire             | <input type="checkbox"/> | <input type="checkbox"/> | <input type="checkbox"/> | <input type="checkbox"/> |
| 14. Etre amputé(e) signifie que je ne peux pas faire ce que je veux faire       | <input type="checkbox"/> | <input type="checkbox"/> | <input type="checkbox"/> | <input type="checkbox"/> |
| 15. Avoir une prothèse limite la quantité de travail que je peux faire          | <input type="checkbox"/> | <input type="checkbox"/> | <input type="checkbox"/> | <input type="checkbox"/> |

# TAPES-R-F

| <b>Limitation des activités</b>                                                                                        | Oui, très limité         | Un peu limité            | Non, pas du tout limité  |
|------------------------------------------------------------------------------------------------------------------------|--------------------------|--------------------------|--------------------------|
| a. Des activités énergiques telles que courir, soulever des objets lourds, pratiquer des sports exigeants physiquement | <input type="checkbox"/> | <input type="checkbox"/> | <input type="checkbox"/> |
| b. Monter plusieurs étages d'escaliers                                                                                 | <input type="checkbox"/> | <input type="checkbox"/> | <input type="checkbox"/> |
| c. Courir pour attraper un bus                                                                                         | <input type="checkbox"/> | <input type="checkbox"/> | <input type="checkbox"/> |
| d. Sports et loisirs                                                                                                   | <input type="checkbox"/> | <input type="checkbox"/> | <input type="checkbox"/> |
| e. Monter un étage d'escaliers                                                                                         | <input type="checkbox"/> | <input type="checkbox"/> | <input type="checkbox"/> |
| f. Marcher plus d' 1 km                                                                                                | <input type="checkbox"/> | <input type="checkbox"/> | <input type="checkbox"/> |
| g. Marcher 500 m                                                                                                       | <input type="checkbox"/> | <input type="checkbox"/> | <input type="checkbox"/> |
| h. Marcher 100 m                                                                                                       | <input type="checkbox"/> | <input type="checkbox"/> | <input type="checkbox"/> |
| i. Pratiquer mes passe-temps                                                                                           | <input type="checkbox"/> | <input type="checkbox"/> | <input type="checkbox"/> |
| j. Travailler                                                                                                          | <input type="checkbox"/> | <input type="checkbox"/> | <input type="checkbox"/> |

| <b>Satisfaction avec la prothèse</b> | Insatisfait              | Satisfait                | Très satisfait           |
|--------------------------------------|--------------------------|--------------------------|--------------------------|
| i. Couleur                           | <input type="checkbox"/> | <input type="checkbox"/> | <input type="checkbox"/> |
| ii. Forme                            | <input type="checkbox"/> | <input type="checkbox"/> | <input type="checkbox"/> |
| iii. Apparence                       | <input type="checkbox"/> | <input type="checkbox"/> | <input type="checkbox"/> |
| iv. Poids                            | <input type="checkbox"/> | <input type="checkbox"/> | <input type="checkbox"/> |
| v. Utilité                           | <input type="checkbox"/> | <input type="checkbox"/> | <input type="checkbox"/> |
| vi. Fiabilité                        | <input type="checkbox"/> | <input type="checkbox"/> | <input type="checkbox"/> |
| vii. Ajustement                      | <input type="checkbox"/> | <input type="checkbox"/> | <input type="checkbox"/> |
| viii. Confort                        | <input type="checkbox"/> | <input type="checkbox"/> | <input type="checkbox"/> |

**Merci de mettre une croix dans la case qui décrit le mieux votre degré de satisfaction avec votre prothèse**

0 1 2 3 4 5 6 7 8 9 10  
 Pas du tout satisfait             Très satisfait
