# Supplementary material for: Cross-cultural adaptation and measurement properties of the French version of the Trinity Amputation and Prosthesis Experience Scales—Revised (TAPES-R)
Source: PubMed Central journal article supplement (PMC7034834; doi:10.1371/journal.pone.0229084), 2020-02-21
Supplement: pone.0229084.s002.pdf [file pone.0229084.s002.pdf]

Code       Date   /   /   

## TAPES-R

This is a questionnaire designed to investigate different aspects of having a prosthesis. There are no right or wrong answers. Please answer every item as honestly as you can. For each question, please tick clearly inside one box using a black or blue pen.

|                                                                                   | <b>Strongly disagree</b> | <b>Disagree</b>          | <b>Agree</b>             | <b>Strongly agree</b>    |
|-----------------------------------------------------------------------------------|--------------------------|--------------------------|--------------------------|--------------------------|
| 1. I have adjusted to having a prosthesis                                         | <input type="checkbox"/> | <input type="checkbox"/> | <input type="checkbox"/> | <input type="checkbox"/> |
| 2. As time goes by, I accept my prosthesis more                                   | <input type="checkbox"/> | <input type="checkbox"/> | <input type="checkbox"/> | <input type="checkbox"/> |
| 3. I feel that I have dealt successfully with this trauma in my life              | <input type="checkbox"/> | <input type="checkbox"/> | <input type="checkbox"/> | <input type="checkbox"/> |
| 4. Although I have a prosthesis, my life is full                                  | <input type="checkbox"/> | <input type="checkbox"/> | <input type="checkbox"/> | <input type="checkbox"/> |
| 5. I have gotten used to wearing a prosthesis                                     | <input type="checkbox"/> | <input type="checkbox"/> | <input type="checkbox"/> | <input type="checkbox"/> |
| 6. I don't care if somebody looks at my prosthesis                                | <input type="checkbox"/> | <input type="checkbox"/> | <input type="checkbox"/> | <input type="checkbox"/> |
| 7. I find it easy to talk about my prosthesis                                     | <input type="checkbox"/> | <input type="checkbox"/> | <input type="checkbox"/> | <input type="checkbox"/> |
| 8. I don't mind people asking about my prosthesis                                 | <input type="checkbox"/> | <input type="checkbox"/> | <input type="checkbox"/> | <input type="checkbox"/> |
| 9. I find it easy to talk about my limb loss in conversation                      | <input type="checkbox"/> | <input type="checkbox"/> | <input type="checkbox"/> | <input type="checkbox"/> |
| 10. I don't care if somebody notices that I am limping                            | <input type="checkbox"/> | <input type="checkbox"/> | <input type="checkbox"/> | <input type="checkbox"/> |
| 11. A prosthesis interferes with the ability to do my work                        | <input type="checkbox"/> | <input type="checkbox"/> | <input type="checkbox"/> | <input type="checkbox"/> |
| 12. Having a prosthesis makes me more dependent on others than I would like to be | <input type="checkbox"/> | <input type="checkbox"/> | <input type="checkbox"/> | <input type="checkbox"/> |
| 13. Having a prosthesis limits the kind of work that I can do                     | <input type="checkbox"/> | <input type="checkbox"/> | <input type="checkbox"/> | <input type="checkbox"/> |
| 14. Being an amputee means that I can't do what I want to do                      | <input type="checkbox"/> | <input type="checkbox"/> | <input type="checkbox"/> | <input type="checkbox"/> |
| 15. Having a prosthesis limits the amount of work that I can do                   | <input type="checkbox"/> | <input type="checkbox"/> | <input type="checkbox"/> | <input type="checkbox"/> |
